# Supplementary material for: Associations between the Prenatal Diet and Neonatal Outcomes—A Secondary Analysis of the Cluster-Randomised GeliS Trial
Source: Nutrients. 2019 Aug 13;11(8):1889. doi: 10.3390/nu11081889 (PMC6723267; doi:10.3390/nu11081889)
Supplement: Supplementary file 1 [file nutrients-11-01889-s001.pdf]

**Table S1.** Associations between dietary intake parameters and offspring body mass index z-score at birth.

| Food groups                                  | BMI z-score <sup>a</sup>                      |                                  |
|----------------------------------------------|-----------------------------------------------|----------------------------------|
|                                              | Adjusted effect size <sup>b</sup><br>(95% CI) | Adjusted p<br>value <sup>b</sup> |
| <b>Soft drinks<sup>c</sup> (200 ml/day)</b>  |                                               |                                  |
| T0                                           | -0.01(-0.03,0.00)                             | 0.069                            |
| T1                                           | -0.01(-0.02,0.01)                             | 0.401                            |
| <b>Light drinks<sup>d</sup> (200 ml/day)</b> |                                               |                                  |
| T0                                           | -0.00(-0.03,0.03)                             | 0.912                            |
| T1                                           | 0.01(-0.02,0.04)                              | 0.621                            |
| <b>Vegetables (150 g/day)</b>                |                                               |                                  |
| T0                                           | 0.06(0.01,0.10)                               | 0.016                            |
| T1                                           | 0.07(0.03,0.11)                               | 0.001                            |
| <b>Fruit (150 g/day)</b>                     |                                               |                                  |
| T0                                           | 0.01(-0.01,0.04)                              | 0.199                            |
| T1                                           | 0.03(0.01,0.06)                               | 0.009                            |
| <b>Dairy products (200 g/day)</b>            |                                               |                                  |
| T0                                           | 0.00(-0.02,0.03)                              | 0.775                            |
| T1                                           | 0.02(-0.01,0.04)                              | 0.217                            |
| <b>Meat and meat products (150 g/day)</b>    |                                               |                                  |
| T0                                           | 0.00(-0.12,0.12)                              | 0.962                            |
| T1                                           | 0.01(-0.13,0.14)                              | 0.923                            |
| <b>Sweets and snacks (50 g/day)</b>          |                                               |                                  |
| T0                                           | 0.00(-0.04,0.04)                              | 0.925                            |
| T1                                           | 0.00(-0.03,0.04)                              | 0.862                            |
| <b>Fast food (250 g/day)</b>                 |                                               |                                  |
| T0                                           | 0.07(-0.25,0.39)                              | 0.672                            |
| T1                                           | -0.13(-0.49,0.24)                             | 0.499                            |
| <b>Energy [100 kcal/day]</b>                 |                                               |                                  |
| T0                                           | -0.01(-0.01,0.00)                             | 0.219                            |
| T1                                           | 0.01(-0.00,0.01)                              | 0.201                            |
| <b>Carbohydrates [10 E%]</b>                 |                                               |                                  |
| T0                                           | 0.01(-0.06,0.07)                              | 0.867                            |
| T1                                           | 0.01(-0.06,0.07)                              | 0.811                            |
| <b>Saccharose [10 g/day]</b>                 |                                               |                                  |
| T0                                           | -0.01(-0.03,0.00)                             | 0.064                            |
| T1                                           | 0.01(-0.01,0.03)                              | 0.265                            |
| <b>Protein [10 E%]</b>                       |                                               |                                  |
| T0                                           | 0.07(-0.08,0.22)                              | 0.359                            |
| T1                                           | 0.07(-0.08,0.23)                              | 0.364                            |
| <b>Fat [10 E%]</b>                           |                                               |                                  |
| T0                                           | -0.02(-0.10,0.05)                             | 0.544                            |
| T1                                           | -0.03(-0.11,0.05)                             | 0.469                            |
| <b>Alcohol [g]</b>                           |                                               |                                  |
| T0                                           | -0.01(-0.04,0.02)                             | 0.466                            |
| T1                                           | -0.09(-0.23,0.06)                             | 0.247                            |
| <b>Caffeine [100 mg]</b>                     |                                               |                                  |
| T0                                           | -0.03(-0.08,0.03)                             | 0.309                            |
| T1                                           | -0.05(-0.11,0.01)                             | 0.104                            |
| <b>HEI [10 points]</b>                       |                                               |                                  |
| T0                                           | 0.05(-0.00,0.10)                              | 0.071                            |
| T1                                           | 0.08(0.02,0.13)                               | 0.006                            |

Estimated is the regression coefficient describing the association between the intake of a portion of a food item, food group or dietary parameter and infant BMI z-score. Portion sizes are defined according to the applied food frequency questionnaire. <sup>a</sup>BMI z-scores were calculated based on German standards [1]. <sup>b</sup>linear regression models adjusted for pre-pregnancy BMI, age, parity and group assignment. <sup>c</sup>sugar-containing sweetened beverages. <sup>d</sup>low or non caloric sweetened beverages. BMI: body mass index; T0: assessment before the 12<sup>th</sup> week of gestation; T1: assessment after the 29<sup>th</sup> week of gestation.

1. Kromeyer-Hauschild, K.; Wabitsch, M.; Kunze, D.; Geller, F.; Geiß, H.C.; Hesse, V.; von Hippel, A.; Jaeger, U.; Johnsen, D.; Korte, W.; et al. Perzentile für den Body-mass-Index für das Kindes-und Jugendalter unter Heranziehung verschiedener deutscher Stichproben. *Mon. Kinderheilkd* **2001**, *149*, 807–818, doi:10.1007/s001120170107.
